# Supplementary material for: Mechanochromism of Agi complexes with iPrNHC(S)NHP(S)(OiPr)2
Source: Royal Society of Chemistry journal article supplement (doi:10.1039/c1dt10688k), 2011-01-01
Supplement: c1dt10688k.pdf [file c1dt10688k.pdf]

## Supporting Information

# Mechanochromism of Ag<sup>I</sup> complexes with *i*PrNHC(S)NHP(S)(OiPr)<sub>2</sub>

Maria G. Babashkina,<sup>\*a</sup> Damir A. Safin,<sup>a</sup> Michael Bolte<sup>b</sup> and Yann Garcia<sup>a</sup>

<sup>a</sup> Institute of Condensed Matter and Nanosciences, MOST – Inorganic Chemistry, Université Catholique de Louvain, Place L. Pasteur 1, 1348 Louvain-la-Neuve, Belgium. Fax: +32(0) 1047 2330; Tel: +32(0) 1047 2831; E-mail: maria.babashkina@ksu.ru

<sup>b</sup> Institut für Anorganische Chemie J.-W.-Goethe-Universität, Frankfurt/Main, Germany.

### Experimental Section

#### Physical measurements

Infrared spectra (Nujol) were recorded with a Thermo Nicolet 380 FT-IR spectrometer in the range 400–4000 cm<sup>-1</sup>. NMR spectra (CDCl<sub>3</sub>) were obtained on a Bruker Avance 300 MHz spectrometers at 25 °C. Fluorescence measurements were carried out on a SPEX FluoroMax-4 spectrofluorometer at room temperature. Electronic spectra of absorption in 10<sup>-4</sup> M solution of CH<sub>2</sub>Cl<sub>2</sub> were measured on a Lambda-35 spectrometer in the range 200–1000 nm. Electrospray ionization mass spectra were measured with a Finnigan MAT 95-XP mass spectrometer on a 10<sup>-6</sup> M solution in CH<sub>3</sub>OH. The speed of sample submission was 2 μL/min. The ionization energy was 4.5 kV. The capillary temperature was 200 °C. Ball-milling was performed using steel balls in a SPEX SamplePrep 8000M Mixer/Mill. Elemental analysis was performed on a Thermoquest Flash EA 1112 Analyzer from CE Instruments.

#### Synthesis of *i*PrNHC(S)NHP(S)(OiPr)<sub>2</sub> (**HL**)

A solution of *i*PrNH<sub>2</sub> (1.180 g, 20 mmol) in anhydrous CH<sub>2</sub>Cl<sub>2</sub> (15 mL) was treated under vigorous stirring with a solution of (*i*PrO)<sub>2</sub>P(S)NCS (5.019 g, 21 mmol) in the same solvent, and the mixture was stirred for 1 h. The solvent was then removed in vacuum. The residue was recrystallized from a CH<sub>2</sub>Cl<sub>2</sub>/*n*-hexane mixture (1:5, v/v).

Colorless crystals. Yield 5.789 g (97%). IR  $\nu$  (cm<sup>-1</sup>): 640 (P=S), 964 (POC), 1543 (S=C–N), 3090, 3382 (NH). <sup>1</sup>H NMR  $\delta$  (ppm): 1.26 (d, <sup>3</sup>J<sub>H,H</sub> = 6.6 Hz, 6H, CH<sub>3</sub>, *i*PrN), 1.33 (d, <sup>3</sup>J<sub>H,H</sub> = 6.2 Hz, 6H, CH<sub>3</sub>, *i*PrO), 1.35 (d, <sup>3</sup>J<sub>H,H</sub> = 6.2 Hz, 6H, CH<sub>3</sub>, *i*PrO), 4.47 (d. sept, <sup>3</sup>J<sub>HNCH</sub> = 8.0 Hz, <sup>3</sup>J<sub>H,H</sub> = 6.5 Hz, 1H, NCH), 4.79 (d. sept, <sup>3</sup>J<sub>POCH</sub> = 10.6 Hz, <sup>3</sup>J<sub>H,H</sub> = 6.2 Hz, 2H, OCH), 6.86 (br. s, 1H, NHP), 7.64 (br. s, 1H, alkylNH); <sup>31</sup>P{<sup>1</sup>H} NMR  $\delta$  (ppm): 52.8. Anal. Calc. for C<sub>10</sub>H<sub>23</sub>N<sub>2</sub>O<sub>2</sub>PS<sub>2</sub> (298.40): C 40.25, H 7.77, N 9.39. Found: C 40.31, H 7.79, N 9.34%.

#### Synthesis of [*i*Ag<sub>3</sub>(*i*PrNHC(S)NP(S)(OiPr)<sub>2</sub>-S,S')<sub>3</sub>]<sub>2</sub> (**[Ag<sub>3</sub>L<sub>3</sub>]<sub>2</sub>**) and [*i*Ag<sub>3</sub>(*i*PrNHC(S)NP(S)(OiPr)<sub>2</sub>-S,S')<sub>3</sub>]<sub>3</sub> (**[Ag<sub>3</sub>L<sub>3</sub>]<sub>3</sub>**)

A suspension of **HL** (0.895 g, 3 mmol) in aqueous methanol (10 mL) was mixed with a methanol solution (10 mL) of KOH (0.185 g, 3.3 mmol). The resulting mixture was added dropwise to a suspension of AgPF<sub>6</sub> (0.758 g, 3 mmol) in aqueous methanol (10 mL). The mixture was stirred at room temperature for 5 h and. The resulting complex were extracted by CH<sub>2</sub>Cl<sub>2</sub>, and dried over anhydrous MgSO<sub>4</sub>. The solvent was then removed in vacuum. The residue was recrystallized from a CH<sub>2</sub>Cl<sub>2</sub>/*n*-hexane mixture (1:3, v/v).

**[Ag<sub>3</sub>L<sub>3</sub>]<sub>2</sub>**: Colourless crystals. Yield 1.094 g (90%). IR  $\nu$  (cm<sup>-1</sup>): 598 (P=S), 961, 973 (POC), 1504 (SCN), 3356 (NH). <sup>1</sup>H NMR  $\delta$  (ppm): 1.17 (d, <sup>3</sup>J<sub>H,H</sub> = 6.4 Hz, 36H, CH<sub>3</sub>, *i*PrN), 1.36 (d, <sup>3</sup>J<sub>H,H</sub> = 6.2 Hz, 72H, CH<sub>3</sub>, *i*PrO), 3.98 (d. sept, <sup>3</sup>J<sub>HNCH</sub> = 7.1 Hz, <sup>3</sup>J<sub>H,H</sub> = 6.5

Hz, 6H, NCH), 4.76 (d sept,  $^3J_{\text{POCH}} = 10.6$  Hz,  $^3J_{\text{H,H}} = 6.1$  Hz, 12H, OCH), 6.39 (d,  $^4J_{\text{PNCNH}} = 7.1$  Hz, 2H, alkylNH), 6.51 (d,  $^4J_{\text{PNCNH}} = 6.7$  Hz, 4H, alkylNH);  $^{13}\text{C}$   $\delta$  (ppm): 21.97 (s, CH<sub>3</sub>, *i*PrN), 23.82 (d,  $^3J_{\text{POCC}} = 3.4$  Hz, CH<sub>3</sub>, *i*PrO), 45.69 (s, NCH), 72.54 (d,  $^2J_{\text{POC}} = 8.0$  Hz, OCH), 169.24 (s, CS), 171.06 (s, CS);  $^{31}\text{P}\{^1\text{H}\}$  NMR  $\delta$  (ppm): 53.5 (s, 2P, NPS), 54.2 (br. s, 4P, NPS). ES-MS positive ion, *m/z* (%): 513.8 (96) [Ag<sub>2</sub>L]<sup>+</sup>, 917.5 (84) [Ag<sub>3</sub>L<sub>2</sub>]<sup>+</sup>, 1216.8 (71) [Ag<sub>3</sub>L<sub>3</sub> + H]<sup>+</sup>, 1255.2 (100) [Ag<sub>3</sub>L<sub>3</sub> + K]<sup>+</sup>, 1323.1 (74) [Ag<sub>4</sub>L<sub>3</sub>]<sup>+</sup>, 1728.4 (62) [Ag<sub>5</sub>L<sub>4</sub>]<sup>+</sup>, 2133.6 (38) [Ag<sub>6</sub>L<sub>5</sub>]<sup>+</sup>, 2539.2 (17) [Ag<sub>7</sub>L<sub>6</sub>]<sup>+</sup>, 2945.2 (11) [Ag<sub>8</sub>L<sub>7</sub>]<sup>+</sup>; ES-MS negative ion, *m/z* (%): 297.7 (100) [L]<sup>-</sup>, 702.6 (72) [AgL<sub>2</sub>]<sup>-</sup>, 1107.2 (62) [Ag<sub>2</sub>L<sub>3</sub>]<sup>-</sup>, 1512.8 (36) [Ag<sub>3</sub>L<sub>4</sub>]<sup>-</sup>, 1917.6 (52) [Ag<sub>4</sub>L<sub>5</sub>]<sup>-</sup>, 2322.7 (27) [Ag<sub>5</sub>L<sub>6</sub>]<sup>-</sup>, 2727.4 (9) [Ag<sub>6</sub>L<sub>7</sub>]<sup>-</sup>. *Anal. Calc.* for C<sub>10</sub>H<sub>22</sub>AgN<sub>2</sub>O<sub>2</sub>PS<sub>2</sub> (405.26): C 29.64, H 5.47, N 6.91. Found: C 29.56, H 5.41, N 6.96%.

**[Ag<sub>3</sub>L<sub>3</sub>]:** The white powder obtained after grinding of [(Ag<sub>3</sub>L<sub>3</sub>)<sub>2</sub>] in a ceramic mortar. IR  $\nu$  (cm<sup>-1</sup>): 600 (P=S), 963, 972 (POC), 1506 (SCN), 3353 (NH).  $^1\text{H}$  NMR  $\delta$  (ppm): 1.15 (d,  $^3J_{\text{H,H}} = 6.3$  Hz, 18H, CH<sub>3</sub>, *i*PrN), 1.37 (d,  $^3J_{\text{H,H}} = 6.1$  Hz, 36H, CH<sub>3</sub>, *i*PrO), 3.99 (d sept,  $^3J_{\text{HNCH}} = 7.1$  Hz,  $^3J_{\text{H,H}} = 6.4$  Hz, 3H, NCH), 4.75 (d sept,  $^3J_{\text{POCH}} = 10.6$  Hz,  $^3J_{\text{H,H}} = 6.1$  Hz, H, OCH), 6.50 (s, 3H, alkylNH);  $^{13}\text{C}$   $\delta$  (ppm): 22.01 (s, CH<sub>3</sub>, *i*PrN), 23.84 (d,  $^3J_{\text{POCC}} = 3.4$  Hz, CH<sub>3</sub>, *i*PrO), 45.76 (s, NCH), 72.48 (d,  $^2J_{\text{POC}} = 8.1$  Hz, OCH), 170.18 (s, CS);  $^{31}\text{P}\{^1\text{H}\}$  NMR  $\delta$  (ppm): 53.3 (s, NPS). ES-MS positive ion, *m/z* (%): 513.2 (70) [Ag<sub>2</sub>L]<sup>+</sup>, 917.9 (100) [Ag<sub>3</sub>L<sub>2</sub>]<sup>+</sup>, 1216.4 (28) [Ag<sub>3</sub>L<sub>3</sub> + H]<sup>+</sup>, 1255.7 (92) [Ag<sub>3</sub>L<sub>3</sub> + K]<sup>+</sup>, 1323.5 (29) [Ag<sub>4</sub>L<sub>3</sub>]<sup>+</sup>; ES-MS negative ion, *m/z* (%): 297.9 (100) [L]<sup>-</sup>, 702.3 (38) [AgL<sub>2</sub>]<sup>-</sup>, 1107.6 (42) [Ag<sub>2</sub>L<sub>3</sub>]<sup>-</sup>. *Anal. Calc.* for C<sub>10</sub>H<sub>22</sub>AgN<sub>2</sub>O<sub>2</sub>PS<sub>2</sub> (405.26): C 29.64, H 5.47, N 6.91. Found: C 29.58, H 5.42, N 6.95%.

#### *Mechanically induced solid-state synthesis of [Ag<sub>3</sub>(*i*PrNHC(S)NP(S)(*Oi*Pr)<sub>2</sub>-S,S')<sub>3</sub>] (Ag<sub>3</sub>L<sub>3</sub>)*

The potassium salt **KL** (1.682 g, 5 mmol), which was obtained similar as described previously,<sup>1</sup> and AgPF<sub>6</sub> (1.264 g, 5 mmol) were ball-milled for eight hours. Then the powder was treated with CH<sub>2</sub>Cl<sub>2</sub> (30 mL) for five minutes and filtered. The solvent was then removed in vacuum. The resulting product was analyzed by elemental analysis, IR and NMR spectroscopy. The obtained data testifies to the formation of the complex [Ag<sub>3</sub>L<sub>3</sub>] with the isolated yield 1.702 g (84%). The recrystallization of the powder complex [Ag<sub>3</sub>L<sub>3</sub>] from a CH<sub>2</sub>Cl<sub>2</sub>/*n*-hexane mixture (1:3, v/v) gives the X-ray suitable crystals of the complex [(Ag<sub>3</sub>L<sub>3</sub>)<sub>2</sub>].

#### *Crystal structure determination and refinement*

The X-ray diffraction data for the crystal of [(Ag<sub>3</sub>L<sub>3</sub>)<sub>2</sub>] were collected on a STOE IPDS-II diffractometer. The images were indexed, integrated and scaled using the X-Area package.<sup>2</sup> Data were corrected for absorption using the PLATON program.<sup>3</sup> The structures were solved by direct methods using the SHELXS<sup>4</sup> program and refined first isotropically and then anisotropically using SHELXL97.<sup>4</sup> Hydrogen atoms were revealed from  $\Delta\rho$  maps and refined using a riding model. All figures were generated using the program Mercury.<sup>5</sup>

CCDC 804264 contains the supplementary crystallographic. These data can be obtained free of charge via <http://www.ccdc.cam.ac.uk/conts/retrieving.html>, or from the Cambridge Crystallographic Data Centre, 12 Union Road, Cambridge CB2 1EZ, UK; fax: (+44) 1223-336-033; or e-mail: [deposit@ccdc.cam.ac.uk](mailto:deposit@ccdc.cam.ac.uk).

#### References

- 1 F. D. Sokolov, D. A. Safin, M. G. Babashkina, N. G. Zabiroy, V. V. Brusko, N. A. Mironov, D. B. Krivolapov, I. A. Litvinov, R. A. Cherkasov and B. N. Solomonov, *Polyhedron*, 2007, **26**, 1550.
- 2 Stoe & Cie, X-Area. Area-Detector Control and Integration Software, Stoe & Cie, Darmstadt, Germany, 2001.
- 3 A. L. Spek, *J. Appl. Crystallogr.*, 2003, **36**, 7
- 4 G. M. Sheldrick, *Acta Crystallogr., Sect. A: Found. Crystallogr.*, 2008, **64**, 112.
- 5 I. J. Bruno, J. C. Cole, P. R. Edgington, M. Kessler, C. F. Macrae, P. McCabe, J. Pearson and R. Taylor, *Acta Crystallogr., Sect. B: Struct. Sci.*, 2002, **58**, 389.

**Table S1.** Crystal data, data collection and refinement details for  $[(\text{Ag}_3\text{L}_3)_2]^a$

|                                            |                                                                                           |
|--------------------------------------------|-------------------------------------------------------------------------------------------|
| Empirical formula                          | $\text{C}_{60}\text{H}_{132}\text{Ag}_6\text{N}_{12}\text{O}_{12}\text{P}_6\text{S}_{12}$ |
| Formula weight                             | 2431.54                                                                                   |
| Temperature (K)                            | 173(2)                                                                                    |
| Crystal system                             | triclinic                                                                                 |
| Space group                                | $P \bar{1}$                                                                               |
| $a$ (Å)                                    | 13.5494(2)                                                                                |
| $b$ (Å)                                    | 14.3050(2)                                                                                |
| $c$ (Å)                                    | 15.1930(2)                                                                                |
| $\alpha$ (°)                               | 109.1326(8)                                                                               |
| $\beta$ (°)                                | 90.8079(8)                                                                                |
| $\gamma$ (°)                               | 110.3766(7)                                                                               |
| $V$ (Å <sup>3</sup> )                      | 2580.54(6)                                                                                |
| $Z$                                        | 1                                                                                         |
| $D_{\text{calc}}$ (Mg m <sup>-3</sup> )    | 1.565                                                                                     |
| $\mu$ (mm <sup>-1</sup> )                  | 1.504                                                                                     |
| $F(000)$                                   | 1236                                                                                      |
| Recording range, $\theta_{\text{max}}$ (°) | 2.64–26.37                                                                                |
| Number of recorded reflections             | 39389                                                                                     |
| Number of recorded independent reflections | 10241 ( $R_{\text{int}} = 0.0389$ )                                                       |
| $R$ indices (all data)                     | $R_1 = 0.0641$ , $wR_2 = 0.0869$                                                          |

<sup>a</sup> Measurements were made using Mo-K $\alpha$  with  $\lambda = 0.71073$  (Å).

**Table S2.** Selected bond lengths (Å) and bond angles (°) for  $[(\text{Ag}_3\text{L}_3)_2]^a$

| <i>Bond lengths</i> |            |                      |            |                   |            |
|---------------------|------------|----------------------|------------|-------------------|------------|
| Ag(1)···Ag(1A)      | 3.8262(5)  | Ag(1B)–S(1B)         | 2.5079(10) | P(1B)–S(1B)       | 1.9726(16) |
| Ag(1)···Ag(1B)      | 3.9437(6)  | Ag(1B)–S(2B)         | 2.5569(11) | S(2)–C(1)         | 1.776(4)   |
| Ag(1A)···Ag(1B)     | 4.1709(5)  | Ag(1B)–S(2)#1        | 2.6877(10) | S(2B)–C(1B)       | 1.746(4)   |
| Ag(1)···Ag(1A)#1    | 4.7959(6)  | S(2)–Ag(1A)          | 2.4382(10) | S(2A)–C(1A)       | 1.758(4)   |
| Ag(1)···Ag(1B)#1    | 4.1153(4)  | S(2A)–Ag(1B)         | 2.4889(10) | N(1)–C(1)         | 1.300(5)   |
| Ag(1A)···Ag(1B)#1   | 4.3877(5)  | P(1)–N(1)            | 1.603(3)   | N(1A)–C(1A)       | 1.306(5)   |
| Ag(1)–S(2B)         | 2.4210(10) | P(1A)–N(1A)          | 1.622(4)   | N(1B)–C(1B)       | 1.323(5)   |
| Ag(1)–S(2)          | 2.4665(11) | P(1B)–N(1B)          | 1.601(3)   | C(1)–N(2)         | 1.333(5)   |
| Ag(1)–S(1)          | 2.5251(12) | P(1)–S(1)            | 1.9810(16) | N(2A)–C(1A)       | 1.333(5)   |
| Ag(1A)–S(1A)        | 2.4580(13) | P(1A)–S(1A)          | 1.992(2)   | N(2B)–C(1B)       | 1.337(5)   |
| Ag(1A)–S(2A)        | 2.5112(10) |                      |            |                   |            |
| <i>Bond angles</i>  |            |                      |            |                   |            |
| S(2)–Ag(1)–S(1)     | 106.18(3)  | Ag(1B)–S(2A)–Ag(1A)  | 113.05(4)  | N(1A)–P(1A)–S(1A) | 115.4(2)   |
| S(2)–Ag(1A)–S(1A)   | 138.19(4)  | Ag(1)–S(2)–Ag(1B)#1  | 105.88(3)  | N(1B)–P(1B)–S(1B) | 118.49(14) |
| S(2)–Ag(1A)–S(2A)   | 114.92(3)  | Ag(1A)–S(2)–Ag(1B)#1 | 117.65(4)  | C(1)–N(1)–P(1)    | 130.0(3)   |
| S(2B)–Ag(1)–S(1)    | 125.03(4)  | P(1)–S(1)–Ag(1)      | 89.15(5)   | C(1A)–N(1A)–P(1A) | 130.4(3)   |
| S(2B)–Ag(1)–S(2)    | 127.11(4)  | P(1A)–S(1A)–Ag(1A)   | 92.73(6)   | C(1B)–N(1B)–P(1B) | 130.2(3)   |
| S(1A)–Ag(1A)–S(2A)  | 106.89(4)  | P(1B)–S(1B)–Ag(1B)   | 95.92(5)   | N(1)–C(1)–N(2)    | 119.9(3)   |
| S(1B)–Ag(1B)–S(2B)  | 103.37(4)  | C(1)–S(2)–Ag(1)      | 106.55(14) | N(1A)–C(1A)–N(2A) | 118.0(4)   |
| S(2A)–Ag(1B)–S(1B)  | 122.72(3)  | C(1)–S(2)–Ag(1A)     | 106.15(12) | N(1B)–C(1B)–N(2B) | 117.2(4)   |
| S(2A)–Ag(1B)–S(2B)  | 125.75(3)  | C(1)–S(2)–Ag(1B)#1   | 116.64(12) | N(1)–C(1)–S(2)    | 126.7(3)   |
| S(1B)–Ag(1B)–S(2)#1 | 115.25(3)  | C(1A)–S(2A)–Ag(1A)   | 101.15(13) | N(1A)–C(1A)–S(2A) | 125.8(3)   |
| S(2A)–Ag(1B)–S(2)#1 | 95.46(3)   | C(1A)–S(2A)–Ag(1B)   | 109.62(15) | N(1B)–C(1B)–S(2B) | 125.3(3)   |
| S(2B)–Ag(1B)–S(2)#1 | 88.40(3)   | C(1B)–S(2B)–Ag(1)    | 108.56(13) | N(2)–C(1)–S(2)    | 113.4(3)   |
| Ag(1)–S(2B)–Ag(1B)  | 104.76(4)  | C(1B)–S(2B)–Ag(1B)   | 102.53(14) | N(2A)–C(1A)–S(2A) | 116.2(3)   |
| Ag(1A)–S(2)–Ag(1)   | 102.54(3)  | N(1)–P(1)–S(1)       | 117.28(13) | N(2B)–C(1B)–S(2B) | 117.5(3)   |

<sup>a</sup> Symmetry transformations used to generate equivalent atoms: #1  $-x + 1, -y, -z + 1$ .

**Table S3.** Hydrogen bond and hydrogen contact lengths (Å) and angles (°) for  $[(\text{Ag}_3\text{L}_3)_2]^a$

| D–H···A             | $d(\text{D}–\text{H})$ | $d(\text{H}···\text{A})$ | $d(\text{D}···\text{A})$ | $\angle(\text{DHA})$ |
|---------------------|------------------------|--------------------------|--------------------------|----------------------|
| N(2)–H(2)···O(2B)#1 | 0.89(4)                | 2.44(4)                  | 3.236(5)                 | 148(4)               |
| N(2A)–H(2A)···S(1B) | 0.899(10)              | 2.728(13)                | 3.620(4)                 | 172(4)               |
| N(2B)–H(2B)···S(1)  | 0.89(4)                | 2.77(4)                  | 3.647(4)                 | 170(4)               |
| C(8)–H(8)···S(1)#2  | 0.98                   | 2.99                     | 3.95                     | 166                  |

<sup>a</sup> Symmetry transformations used to generate equivalent atoms: #1  $-x + 1, -y, -z + 1$ ; #2  $-x, -y, 1 - z$ .

**Table S4.** UV-vis absorption and emission maxima for  $[(\text{Ag}_3\text{L}_3)_2]$  and  $[\text{Ag}_3\text{L}_3]^a$

| Complex                       | $\lambda_{\text{abs}}$ [nm] ( $\epsilon$ [ $\text{dm}^3 \text{mol}^{-1} \text{cm}^{-1}$ ]) | $\lambda_{\text{em}}$ [nm] |
|-------------------------------|--------------------------------------------------------------------------------------------|----------------------------|
| $[(\text{Ag}_3\text{L}_3)_2]$ | 371 (8372)                                                                                 | 573                        |
| $[\text{Ag}_3\text{L}_3]$     | 347 (4487)                                                                                 | 469                        |

<sup>a</sup> The absorption spectrum of the potassium salt **KL** shows a weak absorption band at 298 nm ( $\epsilon = 187 \text{ dm}^3 \text{ mol}^{-1} \text{ cm}^{-1}$ ).

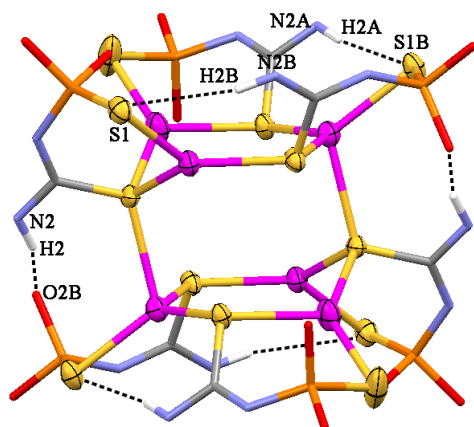

**Figure S1.** Hydrogen bonding in the crystal of the complex  $[(\text{Ag}_3\text{L}_3)_2]$ . Thermal ellipsoids at the 30% probability level (*i*Pr groups and H-atoms, not involved in hydrogen bonding, are omitted for clarity).
